# Supplementary material for: Virulence and Metabolism Crosstalk: Impaired Activity of the Type Three Secretion System (T3SS) in a Pseudomonas aeruginosa Crc-Defective Mutant
Source: MDPI journal article supplement (doi:10.3390/ijms241512304), 2023-08-01
Supplement: s1 [file s1]

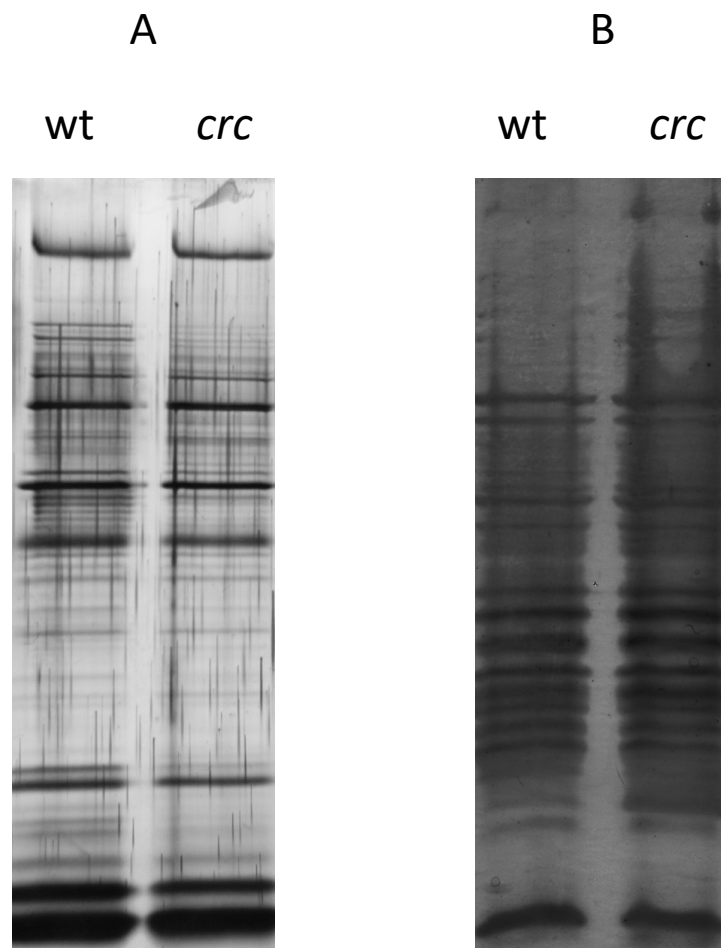

**Figure S1. SDS-PAGE of samples used for Western blot.** The gels were stained with silver. A: secreted proteins. B: intracellular proteins.

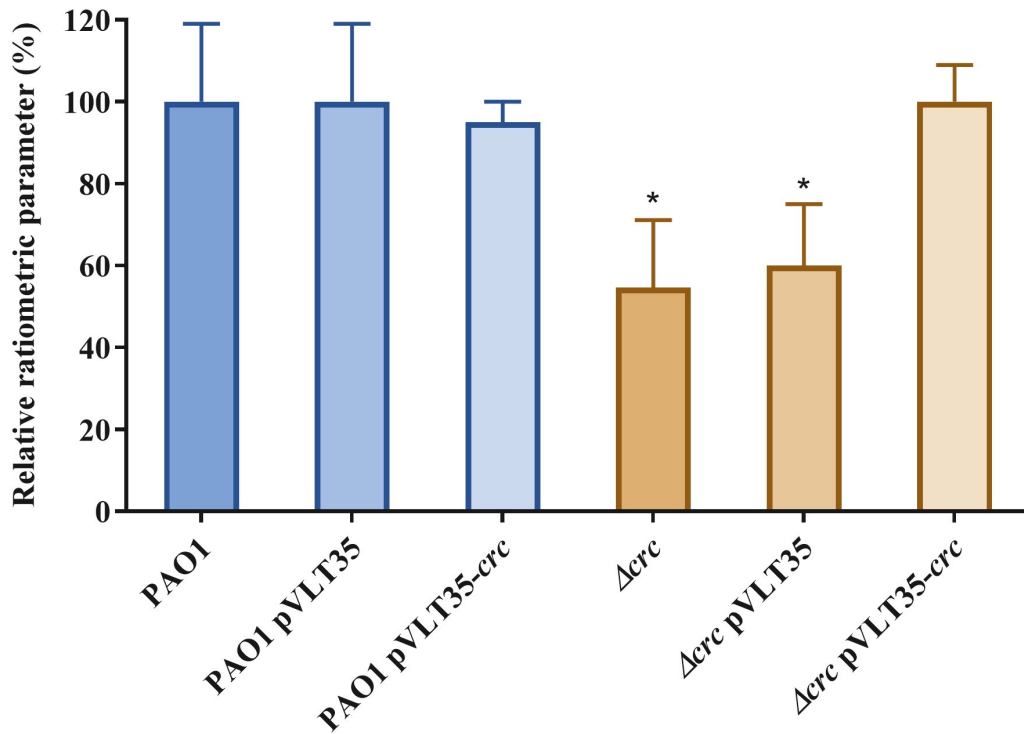

**Figure S2. Complementation with *crc* restores the membrane potential of the  $\Delta crc$  mutant.** As shown, the trans-complementation of the  $\Delta crc$  mutant with a plasmid-encoded *crc* restores the membrane potential to the levels of the wild-type strain. The experiments were performed in triplicates. Errors bars are given as standard deviation of the means of the biological replicates. \* Indicates  $P < 0.05$  calculated by unpaired two-tail t-test.
